# Supplementary material for: Association of Plasma Irisin Levels with Circulating Endothelial Microparticles (EMPs) and Endothelial Progenitor Cells (EPCs) in Children Born Prematurely
Source: MDPI journal article supplement (doi:10.3390/metabo13010120), 2023-01-13
Supplement: s1 [file s1]

## Supplementary material

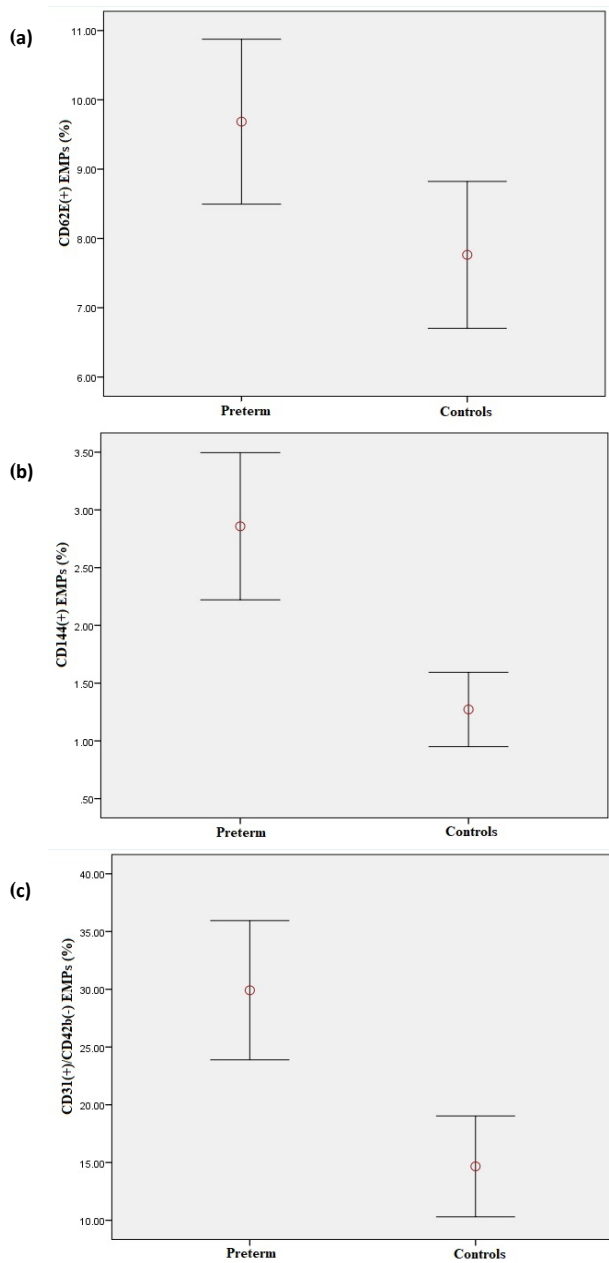

**Figure S1.** Circulating CD62E(+), CD144(+) and CD31(+)/CD42b(-) endothelial microparticles (EMPs) in preterm-born children compared to controls. Mean values of CD62E(+) (a), CD144(+) (b), and CD31(+)/42b(-) EMPs (c) in children born prematurely and controls. Error bars represent standard error of mean.

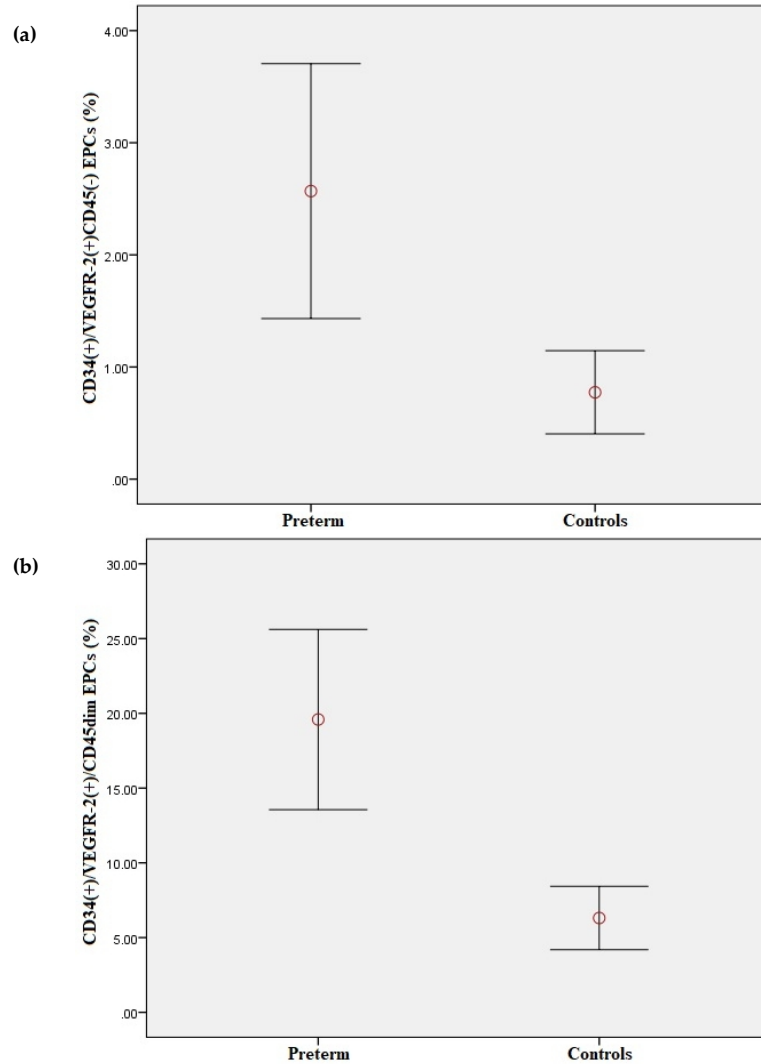

**Figure S2.** Circulating CD34(+)/VEGFR-2(+)/CD45(-) (a) and CD34(+)/VEGFR-2(+)/CD45dim (b) endothelial progenitor cells (EPCs) in preterm-born children compared to controls. Mean values of CD34(+)/VEGFR-2(+)/CD45(-) and CD34(+)/VEGFR-2(+)/CD45dim EPCs in children born prematurely and controls. Error bars represent standard error of mean.

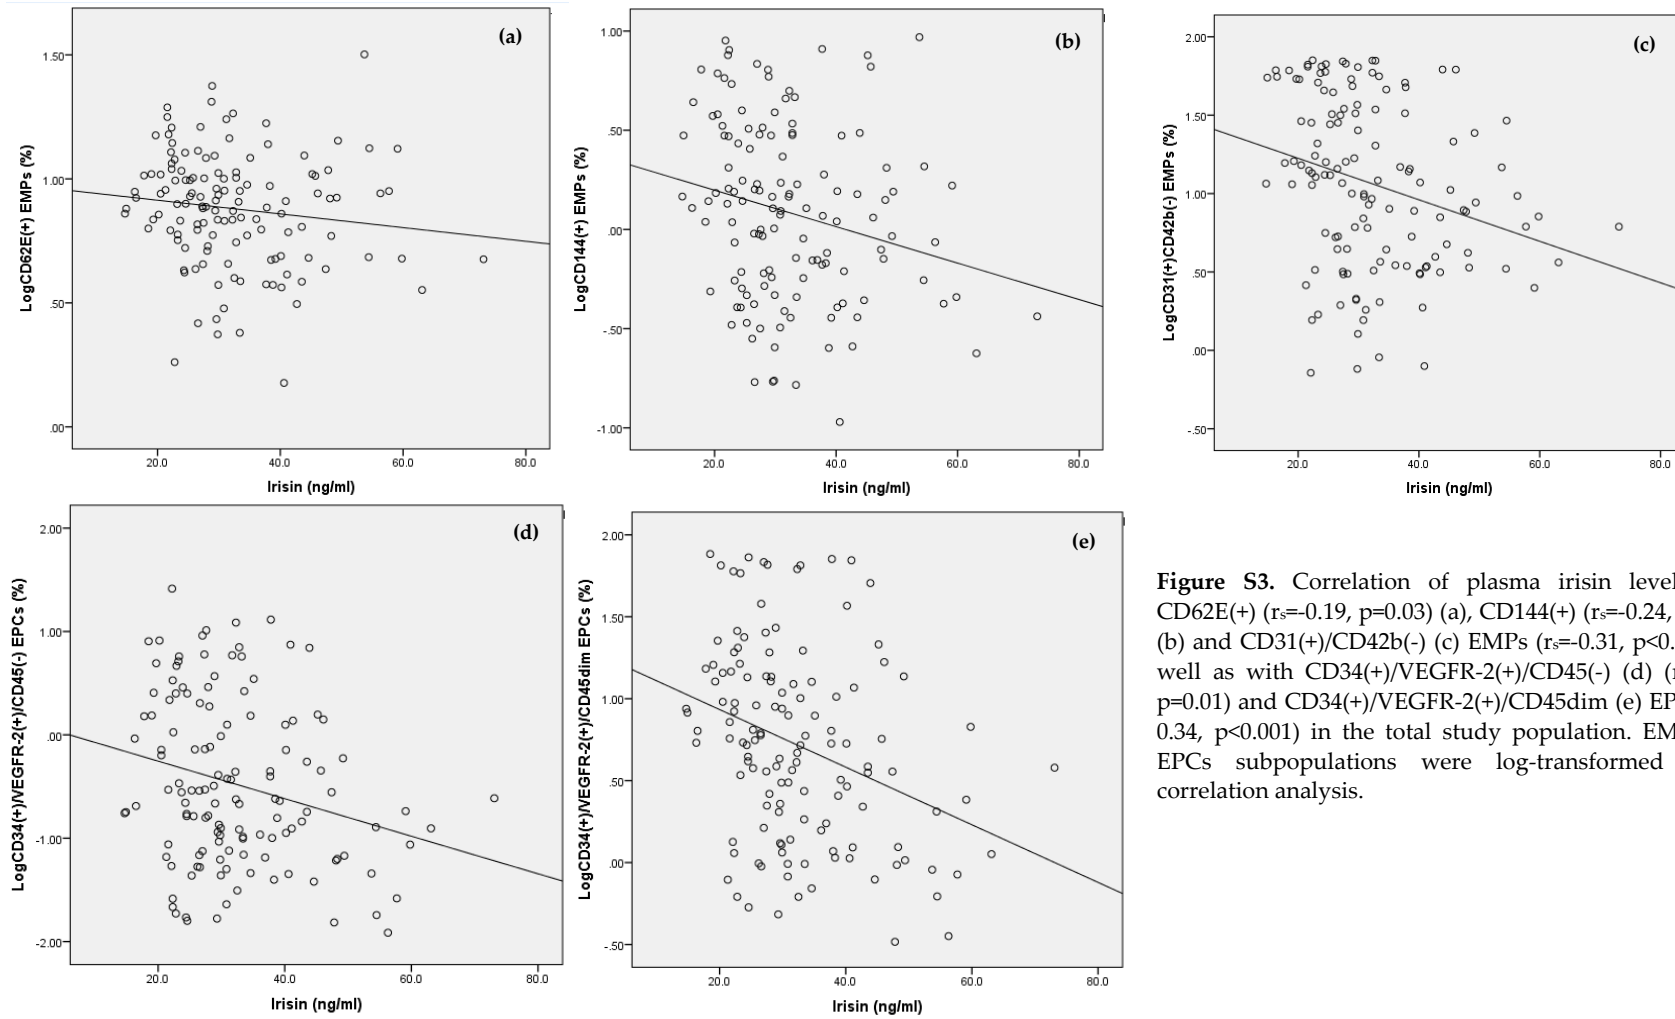

**Figure S3.** Correlation of plasma irisin levels with CD62E(+) ( $r_s=-0.19$ ,  $p=0.03$ ) (a), CD144(+) ( $r_s=-0.24$ ,  $p=0.01$ ) (b) and CD31(+)/CD42b(-) (c) EMPs ( $r_s=-0.31$ ,  $p<0.001$ ), as well as with CD34(+)/VEGFR-2(+)/CD45(-) (d) ( $r_s=-0.23$ ,  $p=0.01$ ) and CD34(+)/VEGFR-2(+)/CD45dim (e) EPCs ( $r_s=-0.34$ ,  $p<0.001$ ) in the total study population. EMPs and EPCs subpopulations were log-transformed before correlation analysis.

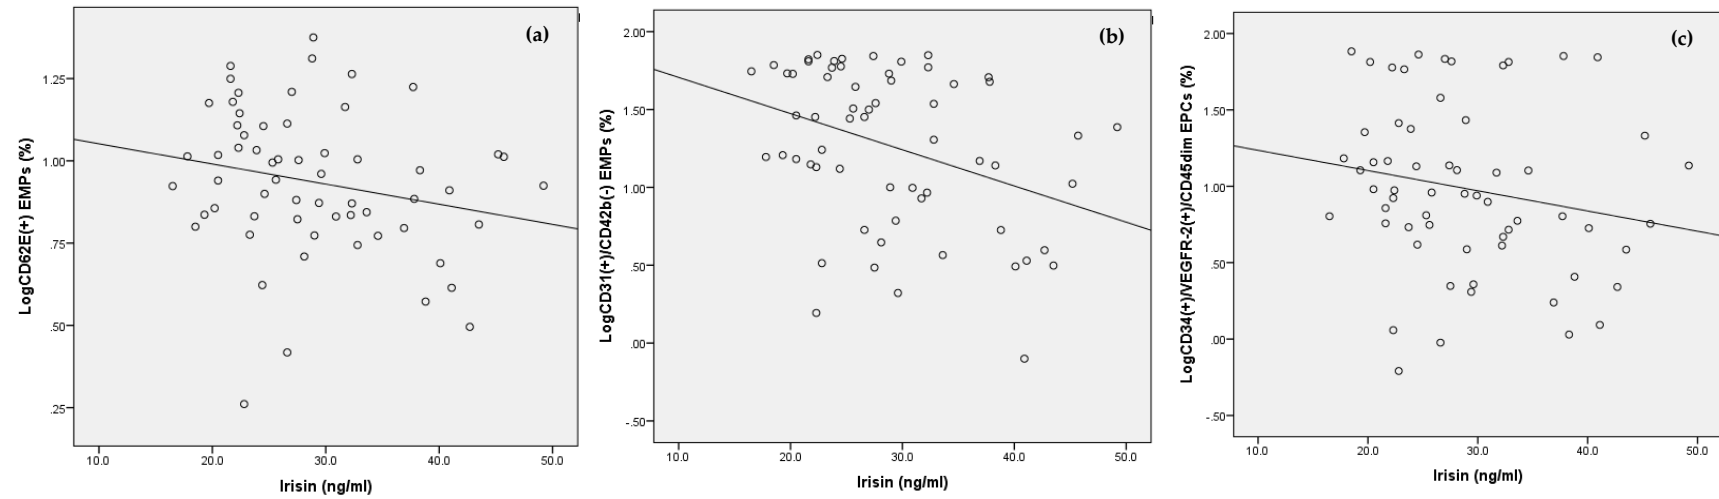

**Figure S4.** Correlation of plasma irisin levels with CD62E(+) (a) ( $r_s=-0.27$ ,  $p=0.03$ ) and CD31(+)/CD42b(-) (b) EMPs ( $r_s=-0.36$ ,  $p=0.004$ ), as well as with CD34(+)/VEGFR-2(+)/CD45dim (c) EPCs ( $r_s=-0.26$ ,  $p=0.04$ ) in the preterm-born population. EMPs and EPCs subpopulations were log-transformed before correlation analysis.
